# Supplementary material for: The Efficacy of Home-Based Exercise in Parkinson Patients compared to center-based exercise regarding the Motor and Non Motor Functions: Systematic Review and Meta-Analysis.
Source: Research Square preprint supplement (doi:10.21203/rs.3.rs-5294633/v1), 2024-10-30
Supplement: Supplementary file 1 [file 179bf67424fdd3a5de801049.docx]

| study | study design | Country | year | Patients age | Sample size | intervention | Duration of disease (year since diagnosis) | HY (Hoehn-Yahr stage) | Unified Parkinson’s Disease Rating Scale Part-III (UPDRS) | | | | | | |
| --- | --- | --- | --- | --- | --- | --- | --- | --- | --- | --- | --- | --- | --- | --- | --- |
| Exercise | | | Control | | | |
| Mean | SD | Total | Mean | | SD | Total |
| Lun 2005 | **prospective, single-blinded, clinical trial.** | Canada | 2005 | HOME group: 66 ± 8, PT group: 67 ± 11 | 19 | an 8-week exercise program, either self-supervised or supervised by a physiotherapist | HOME group: 9 ± 4, PT group: 8 ± 4 | HOME group: 2, PT group: 2 | -5 | 12 | 11 | -6 | 10.8 | | 8 |
| Morris 2009 | **A single-blind randomized controlled clinical trial** | Australia | 2009 | movement strategy group: 68, exercise group: 66. range of :( 52-79) | 28 | Up to 16 therapy sessions, each 45 minutes, were provided over 2 weeks. | - | stage II or III | -1.1 | 15 | 14 | -1.3 | 10.3 | | 14 |
| Cruise 2010 | **RCT** | Australia | 2010 | EIP= 59.47± 11.54, control= 60.6 ± 7.34 | EIP = 15  control = 13 | Exercise Intervention Program (EIP) | EIP mean = 5.87, SD = 3.18 control mean = 5.46, SD = 3.63 | between I and III | N/A | N/A | N/A | N/A | N/A | | N/A |
| Goodwin 2011 | pragmatic randomized  controlled trial | UK | 2011 | intervention: 72 ± 8.6 ,control: 70.1± 8.3 | Intervention (64)  Control (66) | For 10 weeks, a physiotherapist-led group offered strength and balance training with home exercises (intervention) or usual care (control) | intervention mean (SD) = 9.1 (6.4) control mean (SD) = 8.2 (6.4) | intervention mean (SD) =2.6 (0.9)  control mean (SD) = 2.4 (0.9) | N/A | N/A | N/A | N/A | N/A | | N/A |
| Esculier 2012 | **A PIlOT Study** | Canada | 2012 | Healthy subjects: 63.5± 12, Parkinson’s disease group: 61.9± 11 | Healthy subjects (n=8) Parkinson’s disease (n=10) | 6-week home-based  balance training program using Nintendo Wii Fit and  balance board | Parkinson’s disease mean (SD)= 8.5 (3.6) | - | N/A | N/A | N/A | N/A | N/A | | N/A |
| Park 2014 | RCT | Korea | 2014 | Group communal exercise with smart application group: 71.10 ± 5.10, Individual communal exercise with smart application group: 73.50 ± 6.93  Control group: 72.75 ± 7.94 | 29 | Participants used a smart app for a 60-minute communal exercise program, three times a week for 10 weeks, focusing on deep breathing, relaxation, flexibility, strength, balance, and gait. | Group communal exercise with smart application group: 6.22 ± 0.78  Individual communal exercise with smart application group: 5.90 ± 0.87  Control group: 6.25 ± 7.70 | Group communal exercise with smart application group: 2.71 ± 0.48  Individual communal exercise with smart application group: 2.42 ± 0.51  Control group: 2.53 ± 0.53 | N/A | N/A | N/A | N/A | N/A | | N/A |
| Wassom 2014 | Pilot Study | USA | 2014 | 66.9± 8.1 | 7 | Qigong exercise intervention | 3.5 (2.6) | 2.4 (0.8) | N/A | N/A | N/A | N/A | N/A | | N/A |
| King 2015 | **RCT** | USA | 2015 | All: 64.2± 7.3, Home: 64.6±6.8, Individual: 64.2± 6.7, Class: 63.9± 8.5 | 58 | The exercise intervention used the sensorimotor ABC program to address postural systems, biomechanical constraints, kinesthesia, stability limits, bradykinesia, and gait coordination. | All: 6.2 (6.1), Home: 5.2 (5.8), Individual: 7.9 (7.9), Class: 5.4 (3.6) | All: 2.4 (0.5), Home: 2.5 (0.5), individual: 2.4 (0.5), Class: 2.4 (0.5) | 35.4 | 14.1 | 20 | 35.2 | 13.7 | | 17 |
| Sharma 2015 | **RCT- Pilot** | USA | 2015 | Yoga group 62.8 ± 13.2, Control group 73.4 ± 6.5 | 13 | Yoga exercise | yoga group 3 years/2.75 months, control group 3 years/8.4 months | yoga 1.25, control 1.2 | 27.75 | 13.9 | 8 | 21.9 | 12 | | 5 |
| Yang 2015 | **RCT** | Taiwan | 2015 | interventional: 72.5 ±8.4, control group: 75.4 ±6.3 | 23 | Participants had twelve 50-minute balance training sessions, twice a week for 6 weeks, with the experimental and control groups trained separately by two physical therapists. | interventional: 9.4±3.6 control: 8.3 ±4.1 | interventional group 3 (3, 3) control 3 (3, 3) | 2.6 | 17.6 | 11 | 6.8 | 18.1 | | 12 |
| Choi 2016 | **RCT** | Korea | 2016 | TTC: 60.81± 7.6,control:65.54±6.8 " | TTC group (n= 11)  the control group (n= 9) | therapeutic Tai chi (TTC) for 12 weeks | TTC= 5.2± 2.7  control=5.2± 2.7 | stage 1 or 2 | N/A | N/A | N/A | N/A | N/A | | N/A |
| Liu 2016 | RCT / mixed methods | USA | 2016 | Experimental: 65.84 ± 5.45 ,Control: 62.5 ± 3.13 | 54 | Health Qigong Exercises | - | - | N/A | N/A | N/A | N/A | N/A | | N/A |
| Khalil 2017 | **pilot intervention study (RCT)** | Jordan | 2017 | Intervention :58.4± 13.5, control: 60.7± 15.4 | 30 | The intervention used a home exercise DVD designed for individuals with movement disorders, including Parkinson's and Huntington's disease. | intervention: 2.4 ( 0.72), control: 2.2 (0.8) | intervention: 2.4 ± 0.72, control:2.2 ±0.8 | -11.2 | 24.6 | 14 | 4.1 | 25.6 | | 9 |
| Morris 2017 | **RCT** | Australia | 2017 | 71 ± 9 | 133 | The experimental group did 6 weeks of progressive resistance training, movement strategies, and falls education, while the control group did non-specific life skills training. |  | 29% had moderate disease severity (stage III) and 5.3% severe disability (stage IV) | -7 | 20.5 | 55 | -6 | 19.8 | | 53 |
| Paolucci 2017 | **RCT** | Italy | 2017 | Home exercise group:: 67± 8.9, Meziers: 66± 15 | 36 | Home Exercise Group: Patients performed simple routines at home, with spontaneous or diaphragmatic breathing as needed, following PD guidelines. | 3 ± 1.2 | 1.5 ± 0.8 | -3 | 10.4 | 17 | -5.5 | 11.1 | | 17 |
| Song 2017 | **RCT** | Australia | 2017 | Intervention:68 ± 7, control:65±7 | 60 | perform the exergame at the home | intervention 7 (4), control 9 (6) | - | N/A | N/A | N/A | N/A | N/A | | N/A |
| Vanbellingen 2017 | **RCT** | Switzerland | 2017 | HOMEDEXT-Group 67.15 ± 7.94, Theraband-Group:68.16 ± 7.38 | 103 | Home-based treatment (HOMEDEXT) involved patients training 5 days a week for approximately 30 minutes per day over 4 weeks. | HOMEDEXT-Group 6.12 ± 3.52, Theraband-Group 6.35 ± 3.99 | HOMEDEXT-Group 1.94 ± 0.9, Theraband-Group 2 ± 0.82 | -15.6 | 5.8 | 52 | -16 | 5 | | 51 |
| Vanderkolk 2017 | **randomized feasibility trial** | Netherlands | 2017 | Intervention:59·3± 8·3),control:59·4 ± 9·3 | 37 | Aerobic moderate-intensity exercise (AE) is performed at home for 6 months with remote supervision. |  | (H&Y 1–2), | -21 | 45.7 | 37 | -14 | 39 | | 37 |
| Vergara-Diaz 2018 | RCT | U.S | 2018 | Intervention:65.7±3.86,control:62±7.77 | 32 | 6 m tai chi | "intervention=2.9 ±2.38 control=2.9±2.20" | Intervention:11 patients with Stage 2 HY and 5 with Stage 2.5 HY. Control: 13 patients with Stage 2 HY and 3 with Stage 2.5 HY. | 3 | 12 | 12 | 5.57 | 11.8 | | 14 |
| Vorasoot 2019 | RCT | UK | 2019 | Intervention: 66.74, control :69.52 | 46 | The handwriting practice book featured 44 Thai alphabet letters, each 1.5x1.5 cm, in a dotted framework with 1 mm diameter dots spaced 0.5 mm apart. Each page had 30 copies of the same letter for use over 4 weeks. | "intervention=4.41 (4.23) control=3.37 (2.36)" | "intervention=2 (2, 2.5) control=2 (2, 2.5)" | -3.18 | 6.2 | 23 | -0.39 | 7.7 | | 23 |
| Vanderkolk 2019 | **RCT** | Netherlands | 2019 | Intervention:59·3± 8·3,control:59·4 ± 9·3 | 130 | aerobic exercise | intervention 41 (16–87), control 38 (19–81) months | intervention stage 1- 4 (6%) stage 2- 61 (94%), control stage 1- 3 (5%) stage 2- 62 (95%) | -0.5 | 3.68 | 65 | 4.2 | 3.68 | | 65 |
| De luca 2020 | **exploratory study** | Italy | 2020 | experimental:63.2 ± 8.4 control:66.5 ± 6.2 | 40 | Gait training using the Biodex Gait Trainer, a treadmill integrated with music therapy. | - | experimental mean = 1.5, SD = 0.53 | N/A | N/A | N/A | N/A | N/A | | N/A |
| Flynn 2020 | **randomized pilot study** | Australia | 2020 | All:72± 6.9,home:72 ±7.3,center:71± 6.6 | "Centre-based (n=20) Home-based (n=19)" | In Block 1 (5 weeks), all participants did center-based exercise and a self-management program. In Block 2 (5 weeks), they were randomly assigned to either continue center-based exercise (n=20) or switch to a home-based program with telehealth (n=19). Both focused on balance and gait improvement. | "all mean(SD) = 5.0 (4.9)  home mean(SD) = 5.2 (5.4) center mean(SD) = 4.7 (4.5)" | "stage 1  all (N) = 11 home(N) = 6 center(N) = 5  stage 2  all (N) = 14 home(N) = 5  center(N) = 9  stage 3  all (N) = 15 home(N) = 9 center(N) = 6 " | N/A | N/A | N/A | N/A | N/A | | N/A |
| Khuzema 2020 | **RCT** | India | 2020 | Tai Chi: 72 ±5.22, Yoga: 68.11 ± 4.23, Control: 70.89 ± 6.01 | 27 | Tai Chi, Yoga, and conventional exercise programs, each lasting eight weeks, were designed based on expert opinion and existing literature. | Tai Chi: 5.67 ± 2.33, Yoga: 6.2 ± 1.67, control: 5.23 ± 3.12 | modified H &Y 2.5: Tai Chi (3), Yoga (3), control (4) -- modified H & Y 3: Tai Chi (6), Yoga (6), control (5) | 17.67 | 6.3 | 9 | 20.2 | 6.72 | | 9 |
| Wang 2020 | RCT | China | 2020 | Wuqinxi group:67.0 ± 5.6,stretching group:67.1 ± 6.1 | 46 | Wuqinxi Exercise | "wuqinxi group=5.0 ± 3.1 stretching group=5.3 ± 3.8" | "1-1.5 severity is 18 p  2-2.5 severity is 24 p 3 severity is 4 p" | N/A | N/A | N/A | N/A | N/A | | N/A |
| Youm 2020 | Pilot Study | Korea | 2020 | Intervention:68.0 ±6.8,control:72.1 ± 6.0 | 17 | Trunk Resistance and Stretching Exercise | "inntervention+3.9 ± 3.1 control=6.9 ± 3.0" | "baseline intervention=2.40 ± 0.32 control=2.29 ± 0.39 post intervention=2.20 ± 0.82 control=2.29 ± 0.39" | N/A | N/A | N/A | N/A | N/A | | N/A |
| Yuen 2020 | Pilot Study | China | 2020 | Intervention:63.77 ± 1.41, control:64.64 ± 2.57 | "Randomization=49 Share in treatment=36 complete treatment=31" | Conduction Exercise and Self-Acupressure | "intervention=8.41 ± 1.27 control=8.64 ± 1.44" | - | N/A | N/A | N/A | N/A | N/A | | N/A |
| Hortobágyi 2021 | randomized clinical trial. | Hungary | 2021 | Exercise and maintenance group: 67.5± 3.91, exercise only group: 68.1± 3.53, control group: 67.8± 3.84 | 67 | The Exergaming program featured a high-intensity, high-frequency agility intervention, with E+M and E each completing 15 one-hour sessions over 3 weeks. . | exercise and maintenance group: 6.5± 2.7, exercise only group: 6.8± 1.59, control group: 7± 2.46 | exercise and maintenance group: 2.5±2, exercise only group: 2.4± 2, control group: 2.4± 2 | 4 | 14 | 22 | -0.57 | 11.5 | | 26 |
| Khobkhun 2021 | clinical trial | Thailand | 2021 | Exercise group: 66.50 ± 4.17, Control group: 67.00 ± 4.37 | 20 | Turning and stepping characteristics were assessed as participants performed a 180-degree turn on level ground while standing. | Exercise group: 6.36 ± 3.51, Control group: 6.6 ± 3.87 | Exercise group: 2.3 ± 0.48, Control group: 2.3 ± 0.48 | N/A | N/A | N/A | N/A | N/A | | N/A |
| Vasconcellos 2021 | RCT | Brazil | 2021 | 65.6±8.1 | 28 | Telerehabilitation for trunk exercise | 6.0±4.2 | 2.7±0.7 | N/A | N/A | N/A | N/A | N/A | | N/A |
| Wan 2021 | RCT | China | 2021 | Intervention=64.95±7.83 control=67.03±7.47 | 40 | The intervention was a 12-week Health Qigong exercise | "intervention=3.63±1.52 control=3.25±1.73" | - | N/A | N/A | N/A | N/A | N/A | | N/A |
| Winward 2021 | RCT | UK | 2011 | 64.1 ± 8.17 | 39 | exercise | 5.79, 4.27 | - | N/A | N/A | N/A | N/A | N/A | | N/A |
| Wu 2021 | RCT | Taiwan | 2021 | 65.12 ± 7.54 | 98 | programmed exercise | 5.32 (3.85) | "stage I =47 stage II=51" | 0.19 | 6 | 49 | 3.53 | 8.1 | | 49 |
| Choi 2022 | Multicenter parallel randomized controlled, single-blind design. | Seoul and Gyeonggi-do, South Korea | 2022 | - | 60 | Multimodal Rehabilitation included daily life training, home modifications, fine motor and fall prevention exercises, and guardian education. Sessions were 50 minutes long, held twice a week for a total of 10 sessions. | - | - | N/A | N/A | N/A | N/A | N/A | | N/A |
